# Supplementary material for: Crosstalk between RON and androgen receptor signaling in the development of castration resistant prostate cancer
Source: PubMed Central journal article supplement (PMC4924697; doi:10.18632/oncotarget.7287), 2016-02-09
Supplement: oncotarget-07-14048-s001.pdf [file oncotarget-07-14048-s001.pdf]

SUPPLEMENTARY FIGURES

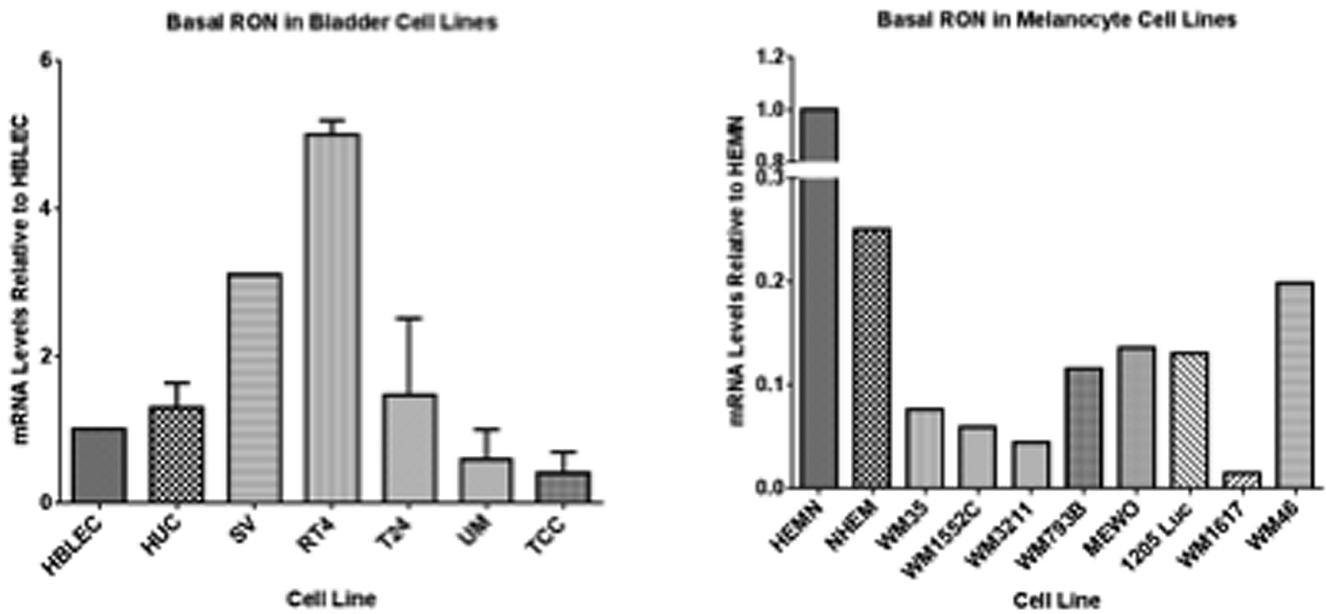

Supplementary Figure 1: Basal expression of RON in bladder and melanoma cell lines.

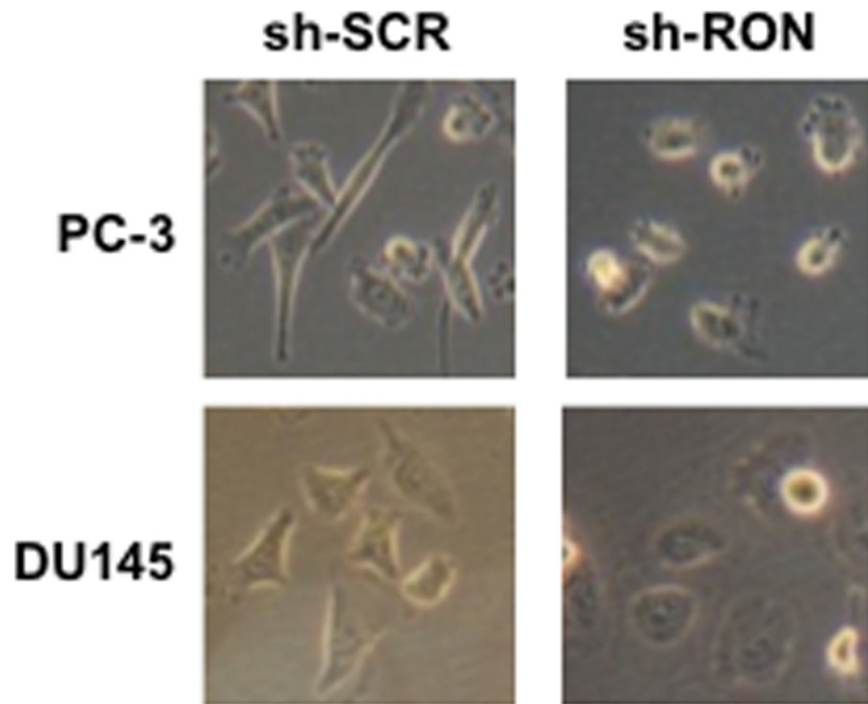

Supplementary Figure 2: Higher magnification phase contrast images of Morphological alterations associated with RON in prostate cancer cell lines.
